# Supplementary material for: Incidence and physiological mechanism of carboplatin-induced electrolyte abnormality among patients with non-small cell lung cancer
Source: PubMed Central journal article supplement (PMC5392339; doi:10.18632/oncotarget.12813), 2016-10-21
Supplement: oncotarget-08-18417-s001.pdf [file oncotarget-08-18417-s001.pdf]

# Incidence and physiological mechanism of carboplatin-induced electrolyte abnormality among patients with non-small cell lung cancer

## Supplementary Material

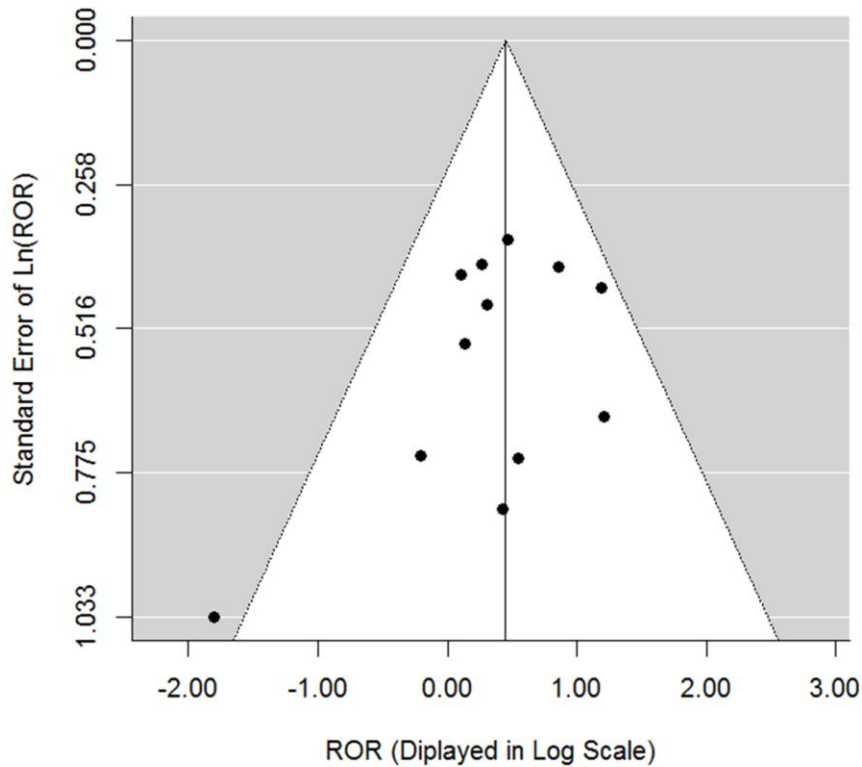

**Supplementary Figure 1.** Funnel plot for detecting reporting bias of hyponatremia adverse events.

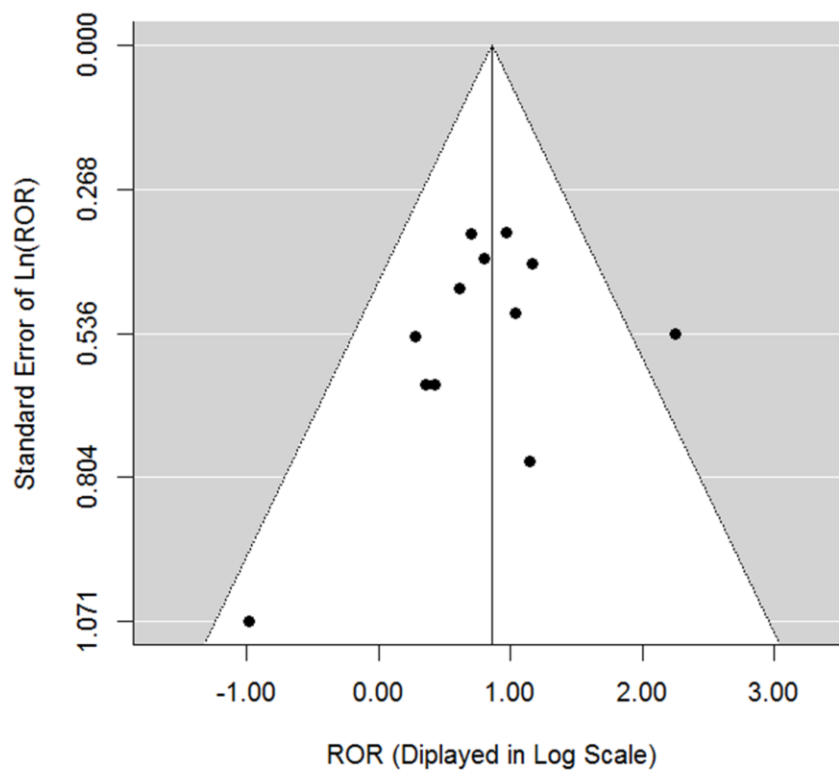

**Supplementary Figure 2.** Funnel plot for detecting reporting bias of hypokalemia adverse events.

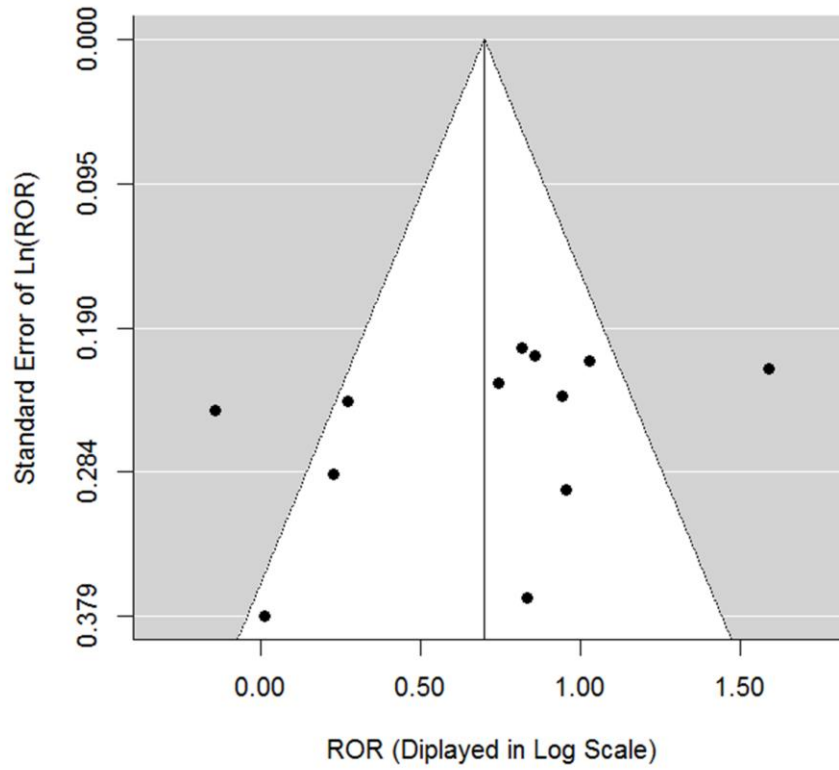

**Supplementary Figure 3.** Funnel plot for detecting reporting bias of dehydration adverse events.
